# Supplementary material for: Commercial sex and risk of HIV, syphilis, and herpes simplex virus-2 among men who have sex with men in six Chinese cities
Source: Springer Nature journal article supplement (doi:10.1186/s12879-016-2130-x), 2016-12-01
Supplement: MOESM1 [file 11949968]

**File Name: Commercial Sex and Sexual behavior Survey among MSM in Big Cities of China**

**Title of Data: Demographic Information**

**Description:**

1. PID(Sig digital number): \_\_\_\_\_
2. Date of birth (YYYY/MM/DD): \_\_\_\_\_
3. Permanent residence address: \_\_\_\_\_ province \_\_\_\_\_ city \_\_\_\_\_ street/town \_\_\_\_\_ village/buiding
4. Marriage status:
  - a. Never married;
  - b. Married with a heterosexual woman;
  - c. Married with a homosexual woman;
  - d. Divorce or widower;
  - e. Live together with a female;
  - f. Live together with a male;
  - g. others \_\_\_\_\_
5. Ethnicity:
  - a. Han;
  - b. Others (please specify \_\_\_\_\_)
6. Education:
  - a. Less than elementary school;
  - b. Elementary school;
  - c. Middle school;
  - d. High school or technique school;
  - e. College or above
7. Are you currently a student now?
  - a. Yes;
  - b. No
8. How long have you been lived in the current city?
  - a. <3 months;
  - b. 3-6 months;
  - c. 7-12 months;
  - d. >1 year,  $\leq$ 2 years;
  - e. >2 years

**Title of Data: Sexual Behavior and recreational drug using behavior**

**Description:**

1. In the recent 6 months, did you have sex with a man by offering money, drug or other goods to him?
  - a. Yes;                    b. No
2. In the recent 6 months, did you have sex with a man who paid you money, drug or other goods?
  - a. Yes;                    b. No
3. How old were you when you had first insertion sex? \_\_\_\_\_(in years)
4. The gender of your first sexual partner:
  - a. Male;                    b. Female (please move to question 4);
5. How old were you when you had first sex with a man? \_\_\_\_\_(in years)
6. What is your predominant role in anal sex?
  - a. Insertive;                    b. Receptive;                    c. Equal
7. In the recent 6 months, did you look for male sex partners in your current residential city?
  - a. Yes (the number of male sex partners \_\_\_\_);                    b. No
8. In the recent 6 months, did you look for male sex partners in other cities?
  - a. Yes (the number of male sex partners \_\_\_\_);                    b. No
9. In the recent 6 months, how often do you use condom during the anal sex?
  - a. Never;                    b. Some times;                    c. Every time
10. In the recent 6 months, how many different male partners did you have sex with?
  - a. \_\_\_\_\_(number of partners);                    b. Unclear
11. In the recent 6 months, did you had sex with female?    1) Yes;    2) No
12. Do you regularly seek male sex partners in the following sites? (Please state the percentage of frequencies, e.g. Internet (90%); Park (10%). The total should be added up to 100 %.)
  - a. Internet -----1) Yes (\_\_\_\_%);                    2) No
  - b. Hotel -----1) Yes (\_\_\_\_%);                    2) No
  - c. Bar----- 1) Yes (\_\_\_\_%);                    2) No

- d. Night club ----- 1) Yes (\_\_\_\_\_%); 2) No
- e. Public bathhouse----- 1) Yes (\_\_\_\_\_%); 2) No
- f. Public restroom----- 1) Yes (\_\_\_\_\_%); 2) No
- g. Park----- 1) Yes (\_\_\_\_\_%); 2) No
- h. MSM club----- 1) Yes (\_\_\_\_\_%); 2) No
- i. Others----- 1) Yes (\_\_\_\_\_%); 2) No

13. In the recent 6 months, did you buy (by using money or gifts) sexual service from casual male partners? 1) Yes; 2) No

14. How many above male sexual partners did you have in the recent 6 months? \_\_\_\_\_

15. In the recent 6 months, did you provide sexual service to any casual male partners to get his/their money or gifts? 1) Yes; 2) No

16. How many above male sexual partners did you have in the recent 6 months? \_\_\_\_\_

17. In the recent 6 months, did you use the below recreation drugs?

- a. Popper[Alky Nitrites] 1) Yes; 2) No
- b. Ecstasy 1) Yes; 2) No
- c. Ice 1) Yes; 2) No
- d. Amphetamine 1) Yes; 2) No
- e. Tramadol 1) Yes; 2) No
- f. Ketamine 1) Yes; 2) No
- g. Others \_\_\_\_\_ 1) Yes; 2) No

Name of the questionnair investigator: \_\_\_\_\_

Survey date: (YYYY/MM/DD): \_\_\_\_\_

Name of the questionnair reviewer: \_\_\_\_\_

Review date: (YYYY/MM/DD): \_\_\_\_\_
